# Supplementary material for: Relationships between Cognitive Functioning and Powered Mobility Device Use: A Scoping Review
Source: MDPI journal article supplement (doi:10.3390/ijerph182312467), 2021-11-26
Supplement: s1 [file s1]

## Web of science (Clarivate)

|    |                                                                                                                                                                                                                                                                                                                                                                                                                                                                                                                                                                                                                                                                                                                                                                                                                                                                                                                                                         |         |
|----|---------------------------------------------------------------------------------------------------------------------------------------------------------------------------------------------------------------------------------------------------------------------------------------------------------------------------------------------------------------------------------------------------------------------------------------------------------------------------------------------------------------------------------------------------------------------------------------------------------------------------------------------------------------------------------------------------------------------------------------------------------------------------------------------------------------------------------------------------------------------------------------------------------------------------------------------------------|---------|
| 1. | "electric wheelchair*" or "motorised wheelchair*" or "motorized wheelchair*" or "power* mobility" or "power* wheelchair*" or scooter*                                                                                                                                                                                                                                                                                                                                                                                                                                                                                                                                                                                                                                                                                                                                                                                                                   | [TOPIC] |
| 2. | "ability to learn*" OR anticipat* OR attention* OR automatism* OR aware* OR cognition* OR ((abilit* OR control* OR defect* OR deficit* OR disabilit* OR disORDER* OR dysfunction* OR function* OR impair* OR performance* OR process* OR rehabilitation OR skill*) NEAR/5 cognitive) OR concentrat* OR conditioning OR "decision making" OR "decision-making" OR ((depth OR distance OR space) NEAR/5 perception*) OR "discrimination learn*" OR ((function* OR syndrome) NEAR/5 dysexecutive) OR emotion* OR ((control* OR dysfunction* OR disorder* OR function*) NEAR/5 executive) OR expectation* OR experienc* OR "intellectual function*" OR memory OR "mental concentration" OR "mental function*" OR ORientation OR perception* OR ((disorder* OR function* OR orientation) NEAR/5 perceptual) OR "problem solving" OR "problem-solving" OR ((discrimination OR learn* OR memory OR navigation* OR orientation* OR perception*) NEAR/5 spatial) | [TOPIC] |
| 3. | 1 AND 2                                                                                                                                                                                                                                                                                                                                                                                                                                                                                                                                                                                                                                                                                                                                                                                                                                                                                                                                                 |         |

## Influence of cognitive functions on powered mobility device use: A systematic review

### CINAHL (Ebsco))

|     |                                                                                                                                                                                                                                                                                                                                                                                                                                                                                                                                                                                                                                                                                                                                                                                                                                                                                                                                 |            |
|-----|---------------------------------------------------------------------------------------------------------------------------------------------------------------------------------------------------------------------------------------------------------------------------------------------------------------------------------------------------------------------------------------------------------------------------------------------------------------------------------------------------------------------------------------------------------------------------------------------------------------------------------------------------------------------------------------------------------------------------------------------------------------------------------------------------------------------------------------------------------------------------------------------------------------------------------|------------|
| 1.  | "electric wheelchair*" or "motorised wheelchair*" or "motorized wheelchair*" or "power* mobility" or "power* wheelchair*" or scooter*                                                                                                                                                                                                                                                                                                                                                                                                                                                                                                                                                                                                                                                                                                                                                                                           | [TI. AB.]  |
| 2.  | (MH "Wheelchairs, Powered")                                                                                                                                                                                                                                                                                                                                                                                                                                                                                                                                                                                                                                                                                                                                                                                                                                                                                                     | Descriptor |
| 3.  | <b>1 or 2</b>                                                                                                                                                                                                                                                                                                                                                                                                                                                                                                                                                                                                                                                                                                                                                                                                                                                                                                                   |            |
| 4.  | "ability to learn*" OR anticipat* OR attention* OR automatism* OR aware* OR cognition* OR ((abilit* OR control* OR defect* OR deficit* OR disabilit* OR disorder* OR dysfunction* OR function* OR impair* OR performance* OR process* OR rehabilitation OR skill*) N5 cognitive) OR concentrat* OR conditioning OR "decision making" OR "decision-making" OR ((depth OR distance OR space) N5 perception*) OR "discrimination learn*" OR ((function* OR syndrome) N5 dysexecutive) OR emotion* OR ((control* OR dysfunction* OR disorder* OR function*) N5 executive) OR expectation* OR experienc* OR "intellectual function*" OR memory OR "mental concentration" OR "mental function*" OR ORientation OR perception* OR ((disorder* OR function* OR orientation) N5 perceptual) OR "problem solving" OR "problem-solving" OR ((discrimination OR learn* OR memory OR navigation* OR orientation* OR perception*) N5 spatial) | [TI. AB.]  |
| 5.  | (MH "Attention")                                                                                                                                                                                                                                                                                                                                                                                                                                                                                                                                                                                                                                                                                                                                                                                                                                                                                                                | Descriptor |
| 6.  | (MH "Cognition Disorders")                                                                                                                                                                                                                                                                                                                                                                                                                                                                                                                                                                                                                                                                                                                                                                                                                                                                                                      | Descriptor |
| 7.  | (MH "Cognition")                                                                                                                                                                                                                                                                                                                                                                                                                                                                                                                                                                                                                                                                                                                                                                                                                                                                                                                | Descriptor |
| 8.  | (MH "Cognitive Ability (Iowa NOC)")                                                                                                                                                                                                                                                                                                                                                                                                                                                                                                                                                                                                                                                                                                                                                                                                                                                                                             | Descriptor |
| 9.  | (MH "Cognitive Orientation (Iowa NOC)")                                                                                                                                                                                                                                                                                                                                                                                                                                                                                                                                                                                                                                                                                                                                                                                                                                                                                         | Descriptor |
| 10. | (MH "Concentration (Iowa NOC)")                                                                                                                                                                                                                                                                                                                                                                                                                                                                                                                                                                                                                                                                                                                                                                                                                                                                                                 | Descriptor |
| 11. | (MH "Conditioning (Psychology)")                                                                                                                                                                                                                                                                                                                                                                                                                                                                                                                                                                                                                                                                                                                                                                                                                                                                                                | Descriptor |
| 12. | (MH "Decision Making")                                                                                                                                                                                                                                                                                                                                                                                                                                                                                                                                                                                                                                                                                                                                                                                                                                                                                                          | Descriptor |
| 13. | (MH "Depth Perception")                                                                                                                                                                                                                                                                                                                                                                                                                                                                                                                                                                                                                                                                                                                                                                                                                                                                                                         | Descriptor |
| 14. | (MH "Emotions")                                                                                                                                                                                                                                                                                                                                                                                                                                                                                                                                                                                                                                                                                                                                                                                                                                                                                                                 | Descriptor |
| 15. | (MH "Executive Function")                                                                                                                                                                                                                                                                                                                                                                                                                                                                                                                                                                                                                                                                                                                                                                                                                                                                                                       | Descriptor |
| 16. | (MH "Life Experiences")                                                                                                                                                                                                                                                                                                                                                                                                                                                                                                                                                                                                                                                                                                                                                                                                                                                                                                         | Descriptor |
| 17. | (MH "Memory")                                                                                                                                                                                                                                                                                                                                                                                                                                                                                                                                                                                                                                                                                                                                                                                                                                                                                                                   | Descriptor |
| 18. | (MH "Mental Processes")                                                                                                                                                                                                                                                                                                                                                                                                                                                                                                                                                                                                                                                                                                                                                                                                                                                                                                         | Descriptor |
| 19. | (MH "Orientation")                                                                                                                                                                                                                                                                                                                                                                                                                                                                                                                                                                                                                                                                                                                                                                                                                                                                                                              | Descriptor |
| 20. | (MH "Perception")                                                                                                                                                                                                                                                                                                                                                                                                                                                                                                                                                                                                                                                                                                                                                                                                                                                                                                               | Descriptor |
| 21. | (MH "Problem Solving")                                                                                                                                                                                                                                                                                                                                                                                                                                                                                                                                                                                                                                                                                                                                                                                                                                                                                                          | Descriptor |
| 22. | (MH "Rehabilitation, Cognitive")                                                                                                                                                                                                                                                                                                                                                                                                                                                                                                                                                                                                                                                                                                                                                                                                                                                                                                | Descriptor |
| 23. | (MH "Spatial Perception")                                                                                                                                                                                                                                                                                                                                                                                                                                                                                                                                                                                                                                                                                                                                                                                                                                                                                                       | Descriptor |
| 24. | 5/23 OR                                                                                                                                                                                                                                                                                                                                                                                                                                                                                                                                                                                                                                                                                                                                                                                                                                                                                                                         | Descriptor |
| 25. | 4 or 24                                                                                                                                                                                                                                                                                                                                                                                                                                                                                                                                                                                                                                                                                                                                                                                                                                                                                                                         | Descriptor |

|     |          |            |
|-----|----------|------------|
| 26. | 3 AND 25 | Descriptor |
|-----|----------|------------|

|              |                     |                        |
|--------------|---------------------|------------------------|
| Chercheur(s) | 1. Alice Pellichero | 2. Marie Denise Lavoie |
| Date         | 2020/03/02          | 2020/03/02             |
| Résultats    |                     |                        |

**EMBASE (Elsevier)**

|     |                                                                                                                                                                                                                                                                                                                                                                                                                                                                                                                                                                                                                                                                                                                                                                                                                                                                                                                                                         |           |
|-----|---------------------------------------------------------------------------------------------------------------------------------------------------------------------------------------------------------------------------------------------------------------------------------------------------------------------------------------------------------------------------------------------------------------------------------------------------------------------------------------------------------------------------------------------------------------------------------------------------------------------------------------------------------------------------------------------------------------------------------------------------------------------------------------------------------------------------------------------------------------------------------------------------------------------------------------------------------|-----------|
| 1.  | "electric wheelchair*" or "motorised wheelchair*" or "motorized wheelchair*" or "power* mobility" or "power* wheelchair*" or scooter*                                                                                                                                                                                                                                                                                                                                                                                                                                                                                                                                                                                                                                                                                                                                                                                                                   | [ti. ab.] |
| 2.  | 'powered wheelchair'/de                                                                                                                                                                                                                                                                                                                                                                                                                                                                                                                                                                                                                                                                                                                                                                                                                                                                                                                                 | Emtree    |
| 3.  | <b>1 or 2</b>                                                                                                                                                                                                                                                                                                                                                                                                                                                                                                                                                                                                                                                                                                                                                                                                                                                                                                                                           |           |
| 4.  | "ability to learn*" OR anticipat* OR attention* OR automatism* OR aware* OR cognition* OR ((abilit* OR control* OR defect* OR deficit* OR disabilit* OR disORDER* OR dysfunction* OR function* OR impair* OR performance* OR process* OR rehabilitation OR skill*) NEAR/5 cognitive) OR concentrat* OR conditioning OR "decision making" OR "decision-making" OR ((depth OR distance OR space) NEAR/5 perception*) OR "discrimination learn*" OR ((function* OR syndrome) NEAR/5 dysexecutive) OR emotion* OR ((control* OR dysfunction* OR disorder* OR function*) NEAR/5 executive) OR expectation* OR experienc* OR "intellectual function*" OR memory OR "mental concentration" OR "mental function*" OR orientation OR perception* OR ((disorder* OR function* OR orientation) NEAR/5 perceptual) OR "problem solving" OR "problem-solving" OR ((discrimination OR learn* OR memory OR navigation* OR orientation* OR perception*) NEAR/5 spatial) |           |
| 5.  | 'cognition'/de                                                                                                                                                                                                                                                                                                                                                                                                                                                                                                                                                                                                                                                                                                                                                                                                                                                                                                                                          | Emtree    |
| 6.  | 'anticipation'/de                                                                                                                                                                                                                                                                                                                                                                                                                                                                                                                                                                                                                                                                                                                                                                                                                                                                                                                                       | Emtree    |
| 7.  | 'attention'/de                                                                                                                                                                                                                                                                                                                                                                                                                                                                                                                                                                                                                                                                                                                                                                                                                                                                                                                                          | Emtree    |
| 8.  | 'awareness'/de                                                                                                                                                                                                                                                                                                                                                                                                                                                                                                                                                                                                                                                                                                                                                                                                                                                                                                                                          | Emtree    |
| 9.  | 'automatism'/de                                                                                                                                                                                                                                                                                                                                                                                                                                                                                                                                                                                                                                                                                                                                                                                                                                                                                                                                         | Emtree    |
| 10. | 'cognitive defect'/de                                                                                                                                                                                                                                                                                                                                                                                                                                                                                                                                                                                                                                                                                                                                                                                                                                                                                                                                   | Emtree    |
| 11. | 'cognitive rehabilitation'/de                                                                                                                                                                                                                                                                                                                                                                                                                                                                                                                                                                                                                                                                                                                                                                                                                                                                                                                           | Emtree    |
| 12. | 'conditioning'/de                                                                                                                                                                                                                                                                                                                                                                                                                                                                                                                                                                                                                                                                                                                                                                                                                                                                                                                                       | Emtree    |
| 13. | 'decision making'/de                                                                                                                                                                                                                                                                                                                                                                                                                                                                                                                                                                                                                                                                                                                                                                                                                                                                                                                                    | Emtree    |
| 14. | 'depth perception'/de                                                                                                                                                                                                                                                                                                                                                                                                                                                                                                                                                                                                                                                                                                                                                                                                                                                                                                                                   | Emtree    |
| 15. | 'discrimination learning'/de                                                                                                                                                                                                                                                                                                                                                                                                                                                                                                                                                                                                                                                                                                                                                                                                                                                                                                                            | Emtree    |
| 16. | 'distance perception'/de                                                                                                                                                                                                                                                                                                                                                                                                                                                                                                                                                                                                                                                                                                                                                                                                                                                                                                                                | Emtree    |
| 17. | 'emotion'/de                                                                                                                                                                                                                                                                                                                                                                                                                                                                                                                                                                                                                                                                                                                                                                                                                                                                                                                                            |           |
| 18. | 'executive function'/de                                                                                                                                                                                                                                                                                                                                                                                                                                                                                                                                                                                                                                                                                                                                                                                                                                                                                                                                 | Emtree    |
| 19. | 'memory'/exp                                                                                                                                                                                                                                                                                                                                                                                                                                                                                                                                                                                                                                                                                                                                                                                                                                                                                                                                            | Emtree    |
| 20. | 'mental concentration'/de                                                                                                                                                                                                                                                                                                                                                                                                                                                                                                                                                                                                                                                                                                                                                                                                                                                                                                                               | Emtree    |
| 21. | 'mental capacity'/de                                                                                                                                                                                                                                                                                                                                                                                                                                                                                                                                                                                                                                                                                                                                                                                                                                                                                                                                    |           |
| 22. | 'mental function'/de                                                                                                                                                                                                                                                                                                                                                                                                                                                                                                                                                                                                                                                                                                                                                                                                                                                                                                                                    |           |
| 23. | 'orientation'/de                                                                                                                                                                                                                                                                                                                                                                                                                                                                                                                                                                                                                                                                                                                                                                                                                                                                                                                                        | Emtree    |
| 24. | 'perception'/de                                                                                                                                                                                                                                                                                                                                                                                                                                                                                                                                                                                                                                                                                                                                                                                                                                                                                                                                         | Emtree    |
| 25. | 'personal experience'/de                                                                                                                                                                                                                                                                                                                                                                                                                                                                                                                                                                                                                                                                                                                                                                                                                                                                                                                                |           |
| 26. | 'problem solving'/de                                                                                                                                                                                                                                                                                                                                                                                                                                                                                                                                                                                                                                                                                                                                                                                                                                                                                                                                    | Emtree    |
| 27. | 'spatial discrimination'/de                                                                                                                                                                                                                                                                                                                                                                                                                                                                                                                                                                                                                                                                                                                                                                                                                                                                                                                             | Emtree    |

|     |                          |        |
|-----|--------------------------|--------|
| 28. | 'spatial orientation'/de | Emtree |
| 29. | 'spatial learning'/de    | Emtree |
| 30. | 'spatial memory'/de      | Emtree |
| 31. | 5/30 or                  |        |
| 32. | 4 or 31                  |        |
| 33. | 3 AND 32                 |        |

|              |                     |                        |
|--------------|---------------------|------------------------|
| Chercheur(s) | 1. Alice Pellichero | 2. Marie Denise Lavoie |
| Date         | 2020/03/02          | 2019/02/18             |
| Résultats    | 68                  | 1005                   |

### medline (ovid)

|     |                                                                                                                                                                                                                                                                                                                                                                                                                                                                                                                                                                                                                                                                                                                                                                                                                                                                                                                                             |           |
|-----|---------------------------------------------------------------------------------------------------------------------------------------------------------------------------------------------------------------------------------------------------------------------------------------------------------------------------------------------------------------------------------------------------------------------------------------------------------------------------------------------------------------------------------------------------------------------------------------------------------------------------------------------------------------------------------------------------------------------------------------------------------------------------------------------------------------------------------------------------------------------------------------------------------------------------------------------|-----------|
| 1.  | "electric wheelchair*" or "motorised wheelchair*" or "motorized wheelchair*" or "power* mobility" or "power* wheelchair*" or scooter*                                                                                                                                                                                                                                                                                                                                                                                                                                                                                                                                                                                                                                                                                                                                                                                                       | [ti. ab.] |
| 2.  | <a href="#">Wheelchairs/</a>                                                                                                                                                                                                                                                                                                                                                                                                                                                                                                                                                                                                                                                                                                                                                                                                                                                                                                                | MESH      |
| 3.  | <b>1 or 2</b>                                                                                                                                                                                                                                                                                                                                                                                                                                                                                                                                                                                                                                                                                                                                                                                                                                                                                                                               |           |
| 4.  | "ability to learn*" or anticipat* or attention* or automatism* or aware* or cognition* or ((abilit* or control* or defect* or deficit* or disabilit* or disorder* or dysfunction* or function* or impair* or performance* or process* or rehabilitation or skill*) adj5 cognitive) or concentrat* or conditioning or "decision making" or "decision-making" or ((depth or distance or space) adj5 perception*) or "discrimination learn*" or ((function* or syndrome) adj5 dysexecutive) or emotion* or ((control* or dysfunction* or disorder* or function*) adj5 executive) or expectation* or experienc* or "intellectual function*" or memory or "mental concentration" or "mental function*" or orientation or perception* or ((disorder* or function* or orientation) adj5 perceptual) or "problem solving" or "problem-solving" or ((discrimination or learn* or memory or navigation* or orientation* or perception*) adj5 spatial) | [ti. ab.] |
| 5.  | <a href="#">anticipation, psychological/</a>                                                                                                                                                                                                                                                                                                                                                                                                                                                                                                                                                                                                                                                                                                                                                                                                                                                                                                | MESH      |
| 6.  | <a href="#">attention/</a>                                                                                                                                                                                                                                                                                                                                                                                                                                                                                                                                                                                                                                                                                                                                                                                                                                                                                                                  | MESH      |
| 7.  | <a href="#">automatism/</a>                                                                                                                                                                                                                                                                                                                                                                                                                                                                                                                                                                                                                                                                                                                                                                                                                                                                                                                 | MESH      |
| 8.  | <a href="#">awareness/</a>                                                                                                                                                                                                                                                                                                                                                                                                                                                                                                                                                                                                                                                                                                                                                                                                                                                                                                                  | MESH      |
| 9.  | <a href="#">cognition disorders/</a>                                                                                                                                                                                                                                                                                                                                                                                                                                                                                                                                                                                                                                                                                                                                                                                                                                                                                                        | MESH      |
| 10. | <a href="#">cognition/</a>                                                                                                                                                                                                                                                                                                                                                                                                                                                                                                                                                                                                                                                                                                                                                                                                                                                                                                                  | MESH      |
| 11. | <a href="#">cognitive dysfunction/</a>                                                                                                                                                                                                                                                                                                                                                                                                                                                                                                                                                                                                                                                                                                                                                                                                                                                                                                      | MESH      |
| 12. | <a href="#">"conditioning (psychology)"/</a>                                                                                                                                                                                                                                                                                                                                                                                                                                                                                                                                                                                                                                                                                                                                                                                                                                                                                                | MESH      |
| 13. | <a href="#">decision making/</a>                                                                                                                                                                                                                                                                                                                                                                                                                                                                                                                                                                                                                                                                                                                                                                                                                                                                                                            | MESH      |
| 14. | <a href="#">depth perception/</a>                                                                                                                                                                                                                                                                                                                                                                                                                                                                                                                                                                                                                                                                                                                                                                                                                                                                                                           | MESH      |
| 15. | <a href="#">discrimination learning/</a>                                                                                                                                                                                                                                                                                                                                                                                                                                                                                                                                                                                                                                                                                                                                                                                                                                                                                                    | MESH      |
| 16. | <a href="#">distance perception/</a>                                                                                                                                                                                                                                                                                                                                                                                                                                                                                                                                                                                                                                                                                                                                                                                                                                                                                                        | MESH      |
| 17. | <a href="#">emotions/</a>                                                                                                                                                                                                                                                                                                                                                                                                                                                                                                                                                                                                                                                                                                                                                                                                                                                                                                                   | MESH      |
| 18. | <a href="#">executive function/</a>                                                                                                                                                                                                                                                                                                                                                                                                                                                                                                                                                                                                                                                                                                                                                                                                                                                                                                         | MESH      |
| 19. | <a href="#">Intelligence/</a>                                                                                                                                                                                                                                                                                                                                                                                                                                                                                                                                                                                                                                                                                                                                                                                                                                                                                                               | MESH      |
| 20. | <a href="#">memory/</a>                                                                                                                                                                                                                                                                                                                                                                                                                                                                                                                                                                                                                                                                                                                                                                                                                                                                                                                     | MESH      |
| 21. | <a href="#">mental processes/</a>                                                                                                                                                                                                                                                                                                                                                                                                                                                                                                                                                                                                                                                                                                                                                                                                                                                                                                           | MESH      |
| 22. | <a href="#">orientation/</a>                                                                                                                                                                                                                                                                                                                                                                                                                                                                                                                                                                                                                                                                                                                                                                                                                                                                                                                | MESH      |
| 23. | <a href="#">orientation, spatial/</a>                                                                                                                                                                                                                                                                                                                                                                                                                                                                                                                                                                                                                                                                                                                                                                                                                                                                                                       | MESH      |
| 24. | <a href="#">perception/</a>                                                                                                                                                                                                                                                                                                                                                                                                                                                                                                                                                                                                                                                                                                                                                                                                                                                                                                                 | MESH      |
| 25. | <a href="#">problem solving/</a>                                                                                                                                                                                                                                                                                                                                                                                                                                                                                                                                                                                                                                                                                                                                                                                                                                                                                                            | MESH      |
| 26. | <a href="#">space perception/</a>                                                                                                                                                                                                                                                                                                                                                                                                                                                                                                                                                                                                                                                                                                                                                                                                                                                                                                           | MESH      |

|            |                                     |      |
|------------|-------------------------------------|------|
| 27.        | <a href="#">spatial learning/</a>   | MESH |
| 28.        | <a href="#">spatial memory/</a>     | MESH |
| 29.        | <a href="#">spatial navigation/</a> | MESH |
| 30.        | 5/29 or                             | MESH |
| <b>31.</b> | 4 or 30                             |      |
| 32.        | 3 AND 31                            |      |

|              |                     |                        |
|--------------|---------------------|------------------------|
| Chercheur(s) | 1. Alice Pallichero | 2. Marie Denise Lavoie |
| Date         | 2019/02/            | 2019/02/               |
| Résultats    |                     |                        |

## PsycInfo (ovid)

|     |                                                                                                                                                                                                                                                                                                                                                                                                                                                                                                                                                                                                                                                                                                                                                                                                                                                                                                                                             |               |
|-----|---------------------------------------------------------------------------------------------------------------------------------------------------------------------------------------------------------------------------------------------------------------------------------------------------------------------------------------------------------------------------------------------------------------------------------------------------------------------------------------------------------------------------------------------------------------------------------------------------------------------------------------------------------------------------------------------------------------------------------------------------------------------------------------------------------------------------------------------------------------------------------------------------------------------------------------------|---------------|
| 1.  | "electric wheelchair*" or "motorised wheelchair*" or "motorized wheelchair*" or "power* mobility" or "power* wheelchair*" or scooter*                                                                                                                                                                                                                                                                                                                                                                                                                                                                                                                                                                                                                                                                                                                                                                                                       | [ti. ab.]     |
| 2.  | mobility aids/                                                                                                                                                                                                                                                                                                                                                                                                                                                                                                                                                                                                                                                                                                                                                                                                                                                                                                                              | Thesaurus     |
| 3.  | <b>1 or 2</b>                                                                                                                                                                                                                                                                                                                                                                                                                                                                                                                                                                                                                                                                                                                                                                                                                                                                                                                               |               |
| 4.  | "ability to learn*" or anticipat* or attention* or automatism* or aware* or cognition* or ((abilit* or control* or defect* or deficit* or disabilit* or disorder* or dysfunction* or function* or impair* or performance* or process* or rehabilitation or skill*) adj5 cognitive) or concentrat* or conditioning or "decision making" or "decision-making" or ((depth or distance or space) adj5 perception*) or "discrimination learn*" or ((function* or syndrome) adj5 dysexecutive) or emotion* or ((control* or dysfunction* or disorder* or function*) adj5 executive) or expectation* or experienc* or "intellectual function*" or memory or "mental concentration" or "mental function*" or orientation or perception* or ((disorder* or function* or orientation) adj5 perceptual) or "problem solving" or "problem-solving" or ((discrimination or learn* or memory or navigation* or orientation* or perception*) adj5 spatial) | [ti. ab.]     |
| 5.  | attention/                                                                                                                                                                                                                                                                                                                                                                                                                                                                                                                                                                                                                                                                                                                                                                                                                                                                                                                                  | Thesaurus APA |
| 6.  | automatism/                                                                                                                                                                                                                                                                                                                                                                                                                                                                                                                                                                                                                                                                                                                                                                                                                                                                                                                                 | Thesaurus APA |
| 7.  | awareness/                                                                                                                                                                                                                                                                                                                                                                                                                                                                                                                                                                                                                                                                                                                                                                                                                                                                                                                                  | Thesaurus APA |
| 8.  | cognition/                                                                                                                                                                                                                                                                                                                                                                                                                                                                                                                                                                                                                                                                                                                                                                                                                                                                                                                                  | Thesaurus APA |
| 9.  | cognitive ability/                                                                                                                                                                                                                                                                                                                                                                                                                                                                                                                                                                                                                                                                                                                                                                                                                                                                                                                          | Thesaurus APA |
| 10. | cognitive control/                                                                                                                                                                                                                                                                                                                                                                                                                                                                                                                                                                                                                                                                                                                                                                                                                                                                                                                          | Thesaurus APA |
| 11. | cognitive impairment/                                                                                                                                                                                                                                                                                                                                                                                                                                                                                                                                                                                                                                                                                                                                                                                                                                                                                                                       | Thesaurus APA |
| 12. | cognitive processes/                                                                                                                                                                                                                                                                                                                                                                                                                                                                                                                                                                                                                                                                                                                                                                                                                                                                                                                        | Thesaurus APA |
| 13. | cognitive rehabilitation/                                                                                                                                                                                                                                                                                                                                                                                                                                                                                                                                                                                                                                                                                                                                                                                                                                                                                                                   | Thesaurus APA |
| 14. | concentration/                                                                                                                                                                                                                                                                                                                                                                                                                                                                                                                                                                                                                                                                                                                                                                                                                                                                                                                              | Thesaurus APA |
| 15. | conditioning/                                                                                                                                                                                                                                                                                                                                                                                                                                                                                                                                                                                                                                                                                                                                                                                                                                                                                                                               | Thesaurus APA |
| 16. | decision making/                                                                                                                                                                                                                                                                                                                                                                                                                                                                                                                                                                                                                                                                                                                                                                                                                                                                                                                            | Thesaurus APA |
| 17. | depth perception/                                                                                                                                                                                                                                                                                                                                                                                                                                                                                                                                                                                                                                                                                                                                                                                                                                                                                                                           | Thesaurus APA |
| 18. | discrimination learning/                                                                                                                                                                                                                                                                                                                                                                                                                                                                                                                                                                                                                                                                                                                                                                                                                                                                                                                    | Thesaurus APA |
| 19. | distance perception/                                                                                                                                                                                                                                                                                                                                                                                                                                                                                                                                                                                                                                                                                                                                                                                                                                                                                                                        | Thesaurus APA |
| 20. | dysexecutive syndrome/                                                                                                                                                                                                                                                                                                                                                                                                                                                                                                                                                                                                                                                                                                                                                                                                                                                                                                                      | Thesaurus APA |
| 21. | emotions/                                                                                                                                                                                                                                                                                                                                                                                                                                                                                                                                                                                                                                                                                                                                                                                                                                                                                                                                   | Thesaurus APA |
| 22. | executive function/                                                                                                                                                                                                                                                                                                                                                                                                                                                                                                                                                                                                                                                                                                                                                                                                                                                                                                                         | Thesaurus APA |
| 23. | expectations/ (anticipation)                                                                                                                                                                                                                                                                                                                                                                                                                                                                                                                                                                                                                                                                                                                                                                                                                                                                                                                | Thesaurus APA |
| 24. | Intelligence/                                                                                                                                                                                                                                                                                                                                                                                                                                                                                                                                                                                                                                                                                                                                                                                                                                                                                                                               | Thesaurus APA |
| 25. | Life experiences/                                                                                                                                                                                                                                                                                                                                                                                                                                                                                                                                                                                                                                                                                                                                                                                                                                                                                                                           | Thesaurus APA |
| 26. | learning ability/                                                                                                                                                                                                                                                                                                                                                                                                                                                                                                                                                                                                                                                                                                                                                                                                                                                                                                                           | Thesaurus APA |
| 27. | memory/                                                                                                                                                                                                                                                                                                                                                                                                                                                                                                                                                                                                                                                                                                                                                                                                                                                                                                                                     | Thesaurus APA |
| 28. | perception/                                                                                                                                                                                                                                                                                                                                                                                                                                                                                                                                                                                                                                                                                                                                                                                                                                                                                                                                 | Thesaurus APA |
| 29. | perceptual orientation/                                                                                                                                                                                                                                                                                                                                                                                                                                                                                                                                                                                                                                                                                                                                                                                                                                                                                                                     | Thesaurus APA |
| 30. | problem solving/                                                                                                                                                                                                                                                                                                                                                                                                                                                                                                                                                                                                                                                                                                                                                                                                                                                                                                                            | Thesaurus APA |
| 31. | spatial learning/                                                                                                                                                                                                                                                                                                                                                                                                                                                                                                                                                                                                                                                                                                                                                                                                                                                                                                                           | Thesaurus APA |
| 32. | spatial memory/                                                                                                                                                                                                                                                                                                                                                                                                                                                                                                                                                                                                                                                                                                                                                                                                                                                                                                                             | Thesaurus APA |
| 33. | spatial perception/                                                                                                                                                                                                                                                                                                                                                                                                                                                                                                                                                                                                                                                                                                                                                                                                                                                                                                                         | Thesaurus APA |
| 34. | "spatial orientation (perception)"/                                                                                                                                                                                                                                                                                                                                                                                                                                                                                                                                                                                                                                                                                                                                                                                                                                                                                                         | Thesaurus APA |
| 35. | 5/34 or                                                                                                                                                                                                                                                                                                                                                                                                                                                                                                                                                                                                                                                                                                                                                                                                                                                                                                                                     | Thesaurus APA |



|            |                 |  |
|------------|-----------------|--|
| <b>36.</b> | <b>4 or 35</b>  |  |
| <b>37.</b> | <b>3 AND 36</b> |  |

|              |                     |                        |
|--------------|---------------------|------------------------|
| Chercheur(s) | 1. Alice Pallichero | 2. Marie Denise Lavoie |
| Date         | 2019/02/            | 2019/02/               |
| Résultats    |                     |                        |
